# Supplementary material for: MiR-199-3p enhances muscle regeneration and ameliorates aged muscle and muscular dystrophy
Source: PubMed Central journal article supplement (PMC8007565; doi:10.1038/s42003-021-01952-2), 2021-03-29
Supplement: 42003_2021_1952_MOESM2_ESM.pdf [file 42003_2021_1952_MOESM2_ESM.pdf]

## Description of Additional Supplementary Files

**File name:** Supplementary Data 1

**Description:** Source data for Main Figures.

**File name:** Supplementary Data 2

**Description:** Source data for Supplementary Figures.
